# Supplementary material for: Population biology of Ellochelon vaigiensis (Quoy & Gaimard, 1825) in the Mekong Delta, Vietnam
Source: PeerJ. 2023 Feb 21;11:e14901. doi: 10.7717/peerj.14901 (PMC9951797; doi:10.7717/peerj.14901)
Supplement: Data S1 [file peerj-11-14901-s001.xlsx]

## Sheet: Sheet1
No.	W	W0	LT	LC	Month (11/2020-3/2022)	Site (1: TPBT; 2: DHTV; 3:TDST; 4: DHBL	Gender (0: Female and 1: Male)	Season (1: Dry; 2: Wet)
1	59.9	46.5	18.7	15.2	1/2021	2	1	2
2	50.63	45.83	17.8	14.4	1/2021	2	1	2
3	46.53	39.68	15.9	12.3	1/2021	2	1	2
4	61.53	54.82	19.6	15.4	1/2021	2	0	2
5	69.3	60.62	19.2	15.6	1/2021	2	0	2
6	60.15	53.51	19.4	15.6	1/2021	2	1	2
7	64.95	58.41	18.1	14.7	1/2021	2	1	2
8	40.27	34.7	15.5	12.6	1/2021	2	1	2
9	52.41	45.22	17.6	13.9	1/2021	2	1	2
10	78.12	66.44	18.9	15.3	1/2021	2	0	2
11	27.27	21.67	13.6	10.9	1/2021	2	1	2
12	45.72	39.71	16.6	12.9	1/2021	2	0	2
13	49.5	46.23	16.1	13.2	1/2021	2	0	2
14	65.38	42.77	18.1	15.2	1/2021	2	1	2
15	65.21	60.39	18.2	14.5	1/2021	2	1	2
16	49.98	40.88	17.6	14	1/2021	2	1	2
17	48.57	43.62	17.7	14	1/2021	2	0	2
18	70.41	61.53	18.8	15	1/2021	2	0	2
19	46.7	41.03	17.5	14.2	1/2021	2	0	2
20	102.46	90.99	21	17	1/2021	2	0	2
21	49.67	44.56	16.2	14.5	1/2021	2	1	2
22	57.86	51.2	17.4	14	1/2021	2	0	2
23	48.05	41.81	16.5	13	1/2021	2	0	2
24	41.67	36.25	16.8	13.4	1/2021	2	1	2
25	39.76	36.14	15.3	12.4	1/2021	2	1	2
26	60.57	29.9	19	15	1/2021	2	1	2
27	58.36	49.7	18	14.5	1/2021	2	0	2
28	61.11	53.33	19	15.5	2/2021	2	0	2
29	32.9	27.6	15.2	12	2/2021	2	0	2
30	34.96	29.32	18	14.5	2/2021	2	0	2
31	24.24	21	13.5	11	2/2021	2	0	2
32	45.83	39.9	17.5	14	2/2021	2	1	2
33	20.82	17.64	12.3	9.8	2/2021	2	1	2
34	23.04	19	13.3	10.5	2/2021	2	1	2
35	39.33	33.45	16	12.5	2/2021	2	0	2
36	31.21	26.76	15	12	2/2021	2	1	2
37	18.08	14.7	11.5	9	2/2021	2	1	2
38	33.07	28.38	14	12	2/2021	2	0	2
39	43.08	41.84	18.5	14.5	2/2021	2	1	2
40	15.17	12.38	11.8	9.5	2/2021	2	1	2
41	27.06	22.67	14	11	2/2021	2	1	2
42	45.36	43.2	18	14	2/2021	2	1	2
43	23.47	21.7	13	10.5	2/2021	2	0	2
44	47.07	30.78	16.8	13.5	2/2021	2	0	2
45	28.4	25.82	14.3	11.4	2/2021	2	1	2
46	36.1	34	15.8	12.5	2/2021	2	1	2
47	44.51	38.57	17.7	14.2	2/2021	2	0	2
48	28.41	23.35	14	11.2	2/2021	2	0	2
49	36.51	31.5	15.5	12.2	2/2021	2	1	2
50	39.44	34.8	14	11.3	2/2021	2	1	2
51	29.31	25.75	14.5	11.6	2/2021	2	1	2
52	19.45	16.41	12.3	9.8	2/2021	2	1	2
53	22.31	18.9	13	10.5	2/2021	2	1	2
54	45.8	42.63	17.5	13.7	2/2021	2	1	2
55	35.15	33.2	15.5	12.5	2/2021	2	1	2
56	99.82	90.89	21.5	17	4/2021	2	0	2
57	120.8	110.31	23.5	20.3	4/2021	2	0	2
58	58.28	53.01	18.2	14	4/2021	2	0	2
59	128.42	103.92	21.5	16.5	4/2021	2	0	2
60	142.04	126.59	23.5	19	4/2021	2	0	2
61	136.71	124.21	21	19	4/2021	2	0	2
62	91.45	83.77	20.8	16.5	4/2021	2	0	2
63	61.18	56	19	15	4/2021	2	1	2
64	72.53	65.29	19.5	15	4/2021	2	1	2
65	86.16	59.64	19	15	4/2021	2	1	2
66	137.91	126.99	24	19	4/2021	2	0	2
67	58.36	54.53	18.5	14.5	4/2021	2	1	2
68	74.59	59.64	19.5	16	4/2021	2	0	2
69	54.44	50.03	17.5	14	4/2021	2	1	2
70	65.78	60.55	19	15	4/2021	2	1	2
71	141.83	130.09	24	19	4/2021	2	0	2
72	95.67	88.81	21.5	16.5	4/2021	2	0	2
73	130.14	116.28	22.5	18	4/2021	2	0	2
74	85.31	77.64	20	16	4/2021	2	0	2
75	74.05	68.16	19.5	15.5	4/2021	2	1	2
76	134.07	121.52	25	20	4/2021	2	0	2
77	148.2	134.25	23.5	19	5/2021	2	1	2
78	173.12	130.09	23	19	5/2021	2	0	2
79	127.2	112.74	22.5	18	5/2021	2	0	2
80	186.9	169.33	26	21	5/2021	2	1	2
81	146.8	131.66	23	18.5	5/2021	2	0	2
82	121.9	111.43	22.5	18	5/2021	2	1	2
83	149.8	134.71	23.5	19.5	5/2021	2	0	2
84	107.97	94.22	22	18.7	3/2021	2	1	2
85	117.75	93.56	23	18.5	3/2021	2	0	2
86	102.98	82.11	21.8	17.5	3/2021	2	0	2
87	104.13	91.05	21.5	17.5	3/2021	2	1	2
88	101	79.79	20	16.2	3/2021	2	0	2
89	41.06	35.733	15.5	12.8	3/2021	2	1	2
90	53.03	45.66	18.5	14.5	3/2021	2	1	2
91	32.88	28.8	14.5	11.8	3/2021	2	1	2
92	23.37	20.31	13	10.5	3/2021	2	1	2
93	25.19	21.81	14	11.5	3/2021	2	1	2
94	23.05	20.12	12.9	10	3/2021	2	1	2
95	24.84	21.8	13	10.5	3/2021	2	1	2
96	14.38	12.21	11	8.5	3/2021	2	1	2
97	20.17	17.59	12	10	3/2021	2	1	2
98	14	12.14	11	8.8	3/2021	2	1	2
99	24.38	20.92	13	10.8	3/2021	2	1	2
100	24.83	22.02	13.5	10.8	3/2021	2	1	2
101	15.67	13.5	11.5	9.4	3/2021	2	1	2
102	17.73	15	12	9.5	3/2021	2	1	2
103	16.55	14.11	11.8	9.6	3/2021	2	1	2
104	13.72	11.69	11.5	9.2	3/2021	2	1	2
105	13.74	11.71	11.5	9	3/2021	2	1	2
106	17.24	14.55	12	9.8	3/2021	2	1	2
107	11.97	9.89	10.8	8.8	3/2021	2	1	2
108	17.95	14.95	12.5	10	3/2021	2	1	2
109	22.59	19.45	13	10.5	3/2021	2	1	2
110	7.08	5.68	8.8	7.1	3/2021	2	1	2
111	64.54	55.59	17.7	13.8	10/2021	2	1	2
112	69.47	62.34	18.5	14.8	10/2021	2	0	2
113	107.33	96.39	20.8	16.7	10/2021	2	0	2
114	64.85	35.92	19.7	14.8	10/2021	2	0	2
115	97.45	87.25	21.2	17.1	10/2021	2	1	2
116	113.91	96.69	21.5	17	10/2021	2	0	2
117	83.45	73.73	18	14.8	10/2021	2	1	2
118	72.45	63.06	18.3	14.4	10/2021	2	1	2
119	84	75.13	19.5	14.9	10/2021	2	0	2
120	85.09	74.39	19.5	14.9	10/2021	2	0	2
121	65.86	59.87	18.9	14.6	10/2021	2	1	2
122	50.71	45.92	16.8	13.2	10/2021	2	1	2
123	51.51	44.99	17.5	14	11/2020	2	0	2
124	49.56	46.08	17	13.5	11/2020	2	0	2
125	57.68	51.35	17.3	14	11/2020	2	0	2
126	57.77	51.98	17.7	14.3	11/2020	2	0	2
127	56.13	49.98	18.3	14.5	11/2020	2	1	2
128	59.3	53.06	18.5	14.5	11/2020	2	1	2
129	65.12	58.56	18.5	14.5	11/2020	2	0	2
130	75.22	67.07	19.5	16	11/2020	2	0	2
131	83.73	74.93	21	17	11/2020	2	1	2
132	52.4	47.06	17.4	13.5	11/2020	2	0	2
133	45.15	40.68	17.5	13.5	11/2020	2	1	2
134	60.94	52.34	18	14	11/2020	2	0	2
135	48.17	44.36	17	13.5	11/2020	2	0	2
136	47.53	42.39	17	13.5	11/2020	2	0	2
137	44.46	40.62	16.5	13	11/2020	2	0	2
138	53.5	48.34	17	13.5	11/2020	2	0	2
139	38.25	32.94	15.6	12.6	11/2020	2	1	2
140	52.93	46.36	17.2	14.1	11/2020	2	1	2
141	64.5	56.24	19.1	15.3	11/2020	2	0	2
142	41.11	35.85	16.4	13.2	11/2020	2	0	2
143	64.22	56.87	18.8	15.2	11/2020	2	0	2
144	40.37	35.58	16.3	13.1	11/2020	2	1	2
145	41.95	37.16	16.8	13.4	11/2020	2	1	2
146	63.27	27.25	18	14.5	12/2020	2	0	2
147	71.8	64.31	19.5	15	12/2020	2	0	2
148	47.05	42.27	16	12.5	12/2020	2	0	2
149	48.7	43.41	16.8	13	12/2020	2	0	2
150	59.26	48.96	17.8	14	12/2020	2	0	2
151	50.68	45.37	17	13.8	12/2020	2	0	2
152	60.26	48	17.4	13.8	12/2020	2	0	2
153	52.72	43.83	16.9	13.5	12/2020	2	0	2
154	46.49	41.42	16.5	12.8	12/2020	2	0	2
155	50.38	39.29	15.8	12.5	12/2020	2	0	2
156	48.03	43.84	17.4	13.8	12/2020	2	0	2
157	66.59	60.42	19	15	12/2020	2	1	2
158	31.89	27.67	14.5	11.5	12/2020	2	0	2
159	102.97	84.27	20.1	17.2	12/2020	1	0	2
160	64.26	58.4	17.3	14.4	12/2020	1	0	2
161	62.33	56.43	17.7	14.8	12/2020	1	1	2
162	61.99	56.05	16.7	14.6	12/2020	1	1	2
163	58.25	52.75	17.2	14.2	12/2020	1	1	2
164	57.95	52.31	17.1	14.1	12/2020	1	1	2
165	57.81	52.16	17.6	14.2	12/2020	1	1	2
166	53.55	47.46	17	14.9	12/2020	1	1	2
167	55.61	49.67	17.1	14.2	12/2020	1	1	2
168	62.8	54.95	17.3	14.5	12/2020	1	0	2
169	51.9	49.36	17.3	14.2	12/2020	1	1	2
170	51.23	46.23	16.2	13.2	12/2020	1	1	2
171	56.84	50.9	17	14	12/2020	1	0	2
172	50.79	45.64	17.1	14.2	12/2020	1	0	2
173	47.44	42.28	16.5	12.5	12/2020	1	0	2
174	43.65	38.04	15.7	13.1	12/2020	1	1	2
175	79.15	73.45	28.7	24.36	1/2021	1	1	2
176	42.33	38.14	16.5	13.3	1/2021	1	0	2
177	31.41	29.3	15	12	1/2021	1	1	2
178	42.7	39.2	18.5	15	1/2021	1	1	2
179	24.9	19.6	13.5	11	1/2021	1	1	2
180	20.7	18.65	13	10.5	1/2021	1	0	2
181	47.7	42.7	15.5	13	1/2021	1	1	2
182	50.11	45.15	16.5	13.5	1/2021	1	1	2
183	93.2	87.7	22.5	17.5	1/2021	1	0	2
184	24.8	22.65	14	11	1/2021	1	1	2
185	46.72	40.92	17.3	14.8	2/2021	1	1	2
186	64.28	51.34	18.4	14.5	2/2021	1	0	2
187	28.76	26.04	14.5	11.8	2/2021	1	1	2
188	52.17	47.51	18	14.3	2/2021	1	1	2
189	37.78	32.98	15.8	13.2	2/2021	1	1	2
190	86.28	78.89	21	16.5	2/2021	1	1	2
191	30.5	26.48	17	13.5	2/2021	1	1	2
192	50.37	43.64	17.4	14.2	2/2021	1	1	2
193	40.32	36.52	16	12.8	2/2021	1	1	2
194	41.11	37.29	16	13	2/2021	1	1	2
195	39.54	35.63	15.5	12.4	2/2021	1	1	2
196	39.24	35.65	15.2	12.6	2/2021	1	1	2
197	53.5	48.04	16.8	13.6	2/2021	1	1	2
198	38.84	31.95	15	12.3	2/2021	1	0	2
199	33.55	30.82	13.5	10.6	2/2021	1	1	2
200	36.46	29.36	15	11.9	2/2021	1	0	2
201	48.08	44.92	16.5	13.8	2/2021	1	1	2
202	30.32	27.22	15	11.6	2/2021	1	0	2
203	30.06	26.2	14	11.2	2/2021	1	1	2
204	28.32	21.76	13	10.3	2/2021	1	0	2
205	31.74	27.63	14	11.6	2/2021	1	1	2
206	13.97	11.22	10.5	9.6	2/2021	1	1	2
207	64.684	56.5985	17.819	14.935	10/2021	1	0	2
208	53.457	50.8408	17.819	14.626	10/2021	1	1	2
209	57.8757	52.0253	17.613	14.523	10/2021	1	1	2
210	58.5452	52.427	17.51	14.42	10/2021	1	0	2
211	52.3137	47.0092	17.613	14.626	10/2021	1	0	2
212	48.8632	43.5484	16.995	12.875	10/2021	1	0	2
213	44.9595	39.1812	16.171	13.493	10/2021	1	1	2
214	81.5245	75.6535	23.3	20.3	10/2021	1	1	2
215	43.5999	39.2842	16.995	13.699	10/2021	1	0	2
216	32.3523	30.179	15.45	12.36	10/2021	1	1	2
217	43.981	40.376	19.055	15.45	10/2021	1	1	2
218	25.647	20.188	13.905	11.33	10/2021	1	1	2
219	21.321	17.69	13.39	10.815	10/2021	1	0	2
220	49.131	43.981	15.965	13.39	10/2021	1	1	2
221	51.6133	46.5045	16.995	13.905	10/2021	1	1	2
222	95.996	90.331	23.175	20.1	10/2021	1	0	2
223	25.544	23.3295	14.42	11.33	10/2021	1	1	2
224	48.1216	42.1476	17.819	15.244	10/2021	1	1	2
225	66.2084	52.8802	18.952	14.935	10/2021	1	0	2
226	29.6228	26.8212	14.935	12.154	10/2021	1	1	2
227	53.7351	48.9353	18.54	14.729	10/2021	1	1	2
228	38.9134	33.9694	16.274	13.596	10/2021	1	1	2
229	88.8684	81.2567	21.63	16.995	10/2021	1	1	2
230	31.415	2.36	17.51	13.905	11/2020	1	1	2
231	51.8811	44.9492	17.922	14.626	11/2020	1	1	2
232	41.5296	37.6156	16.48	13.184	11/2020	1	1	2
233	42.3433	38.4087	16.48	13.39	11/2020	1	1	2
234	40.7262	36.6989	15.965	12.772	11/2020	1	1	2
235	40.4172	36.7195	15.656	12.978	11/2020	1	1	2
236	55.105	49.4812	17.304	14.008	11/2020	1	1	2
237	40.0052	32.9085	15.45	12.669	11/2020	1	0	2
238	34.5565	31.7446	13.905	10.918	11/2020	1	1	2
239	37.5538	30.2408	15.45	12.257	11/2020	1	0	2
240	49.5224	46.2676	16.995	14.214	11/2020	1	1	2
241	31.2296	28.0366	15.45	11.948	11/2020	1	0	2
242	30.9618	26.986	14.42	11.536	11/2020	1	1	2
243	29.1696	22.4128	13.39	10.609	11/2020	1	0	2
244	32.6922	28.4589	14.42	11.948	11/2020	1	1	2
245	14.3891	13.3282	10.815	9.888	11/2020	1	1	2
246	60.564	53.9175	18.165	14.7	3/2021	1	0	2
247	60.6585	54.579	18.585	15.015	3/2021	1	0	2
248	58.9365	52.479	19.215	15.225	3/2021	1	1	2
249	62.265	55.713	19.425	15.225	3/2021	1	1	2
250	68.376	61.488	19.425	15.225	3/2021	1	0	2
251	78.981	70.4235	20.475	16.8	3/2021	1	0	2
252	87.9165	78.6765	22.05	17.85	3/2021	1	1	2
253	55.02	49.413	18.27	14.175	3/2021	1	0	2
254	47.4075	42.714	18.375	14.175	3/2021	1	1	2
255	63.987	54.957	18.9	14.7	3/2021	1	0	2
256	50.5785	46.578	17.85	14.175	3/2021	1	0	2
257	63.273	50.4	18.27	14.49	3/2021	1	0	2
258	55.356	46.0215	17.745	14.175	3/2021	1	0	2
259	48.8145	43.491	17.325	13.44	4/2021	1	0	2
260	52.899	41.2545	16.59	13.125	4/2021	1	0	2
261	50.4315	46.032	18.27	14.49	4/2021	1	0	2
262	69.9195	63.441	19.95	15.75	4/2021	1	1	2
263	33.4845	29.0535	15.225	12.075	4/2021	1	0	2
264	49.9065	44.5095	17.85	14.175	4/2021	1	0	2
265	46.683	42.651	17.325	13.65	4/2021	1	0	2
266	56.175	50.757	17.85	14.175	4/2021	1	0	2
267	40.1625	34.587	16.38	13.23	4/2021	1	1	2
268	55.5765	48.678	18.06	14.805	4/2021	1	1	2
269	67.725	59.052	20.055	16.065	4/2021	1	0	2
270	43.1655	37.6425	17.22	13.86	4/2021	1	0	2
271	67.431	59.7135	19.74	15.96	4/2021	1	0	2
272	42.3885	37.359	17.115	13.755	4/2021	1	1	2
273	44.0475	39.018	17.64	14.07	4/2021	1	1	2
274	66.4335	28.6125	18.9	15.225	4/2021	1	0	2
275	75.39	67.5255	20.475	15.75	5/2021	1	0	2
276	49.4025	44.3835	16.8	13.125	5/2021	1	0	2
277	51.135	45.5805	17.64	13.65	5/2021	1	0	2
278	62.223	51.408	18.69	14.7	5/2021	1	0	2
279	53.214	47.6385	17.85	14.49	5/2021	1	0	2
280	58.8336	52.377	17.646	14.28	5/2021	1	0	2
281	60.486	54.1212	18.87	14.79	5/2021	1	1	2
282	66.4224	59.7312	18.87	14.79	5/2021	1	0	2
283	48.4806	43.2378	17.34	13.77	5/2021	1	0	2
284	45.3492	41.4324	16.83	13.26	5/2021	1	1	2
285	41.9322	36.567	16.728	13.464	5/2021	1	0	2
286	65.5044	58.0074	19.176	15.504	5/2021	1	0	2
287	73.236	65.5962	19.89	15.3	5/2021	1	0	2
288	47.991	43.1154	16.32	12.75	5/2021	1	0	2
289	51.6936	46.2774	17.34	14.076	5/2021	1	0	2
290	48.9906	44.7168	17.748	14.076	5/2021	1	0	2
291	38.26	32.94	15.6	12.6	10/2021	4	1	2
292	52.93	46.36	17.2	14.1	10/2021	4	1	2
293	64.5	56.24	19.1	15.3	10/2021	4	0	2
294	41.11	35.85	16.4	13.2	10/2021	4	1	2
295	64.22	56.87	18.8	15.2	10/2021	4	1	2
296	40.37	35.58	16.3	13.1	10/2021	4	1	2
297	41.95	37.16	16.8	13.4	10/2021	4	1	2
298	60.42	54.28	18.9	15.5	10/2021	4	0	2
299	42.42	38.99	14.6	11.6	10/2021	4	0	2
300	55.6	49.71	18.9	15	10/2021	4	0	2
301	68.92	62.18	20	15.7	10/2021	4	0	2
302	31.41	29.3	15	12	10/2021	4	1	2
303	50.11	45.15	16.5	13.5	10/2021	4	0	2
304	58.25	52.75	17.2	14.2	10/2021	4	1	2
305	57.95	52.31	17.1	14.1	10/2021	4	1	2
306	56.19	50.51	17.1	14.1	10/2021	4	0	2
307	56.84	50.9	17	14	10/2021	4	0	2
308	51.51	44.99	17.5	14	10/2021	4	0	2
309	49.56	46.08	17	13.5	10/2021	4	0	2
310	57.68	51.35	17.3	14	10/2021	4	0	2
311	52.4	47.06	17.4	13.5	10/2021	4	0	2
312	38.26	32.94	15.6	12.6	10/2021	4	1	2
313	52.93	46.36	17.2	14.1	10/2021	4	1	2
314	64.5	56.24	19.1	15.3	10/2021	4	0	2
315	41.11	35.85	16.4	13.2	10/2021	4	1	2
316	26.42	23.16	13.5	10.6	11/2020	4	1	2
317	25.12	22.05	13	10.4	11/2020	4	1	2
318	23.6	21.54	13.4	10.5	11/2020	4	0	2
319	31.66	27.87	14.9	12	11/2020	4	0	2
320	17.94	15.62	11.8	9.9	11/2020	4	0	2
321	29.1	25.8	14.5	11.5	11/2020	4	0	2
322	16.15	13.94	11.7	9.3	11/2020	4	0	2
323	20.86	17.66	12.3	9.8	11/2020	4	1	2
324	33.1	28.6	14.5	11.6	11/2020	4	0	2
325	9.95	7.98	9.5	7.5	11/2020	4	1	2
326	13.93	12.5	11.2	8.8	11/2020	4	1	2
327	12.49	11.03	10.2	8.3	11/2020	4	0	2
328	13.55	12.23	11	8.8	11/2020	4	0	2
329	11.39	9.94	10.2	8	11/2020	4	1	2
330	14.75	13.19	11.5	8.5	11/2020	4	0	2
331	20.53	18.11	13	10.3	11/2020	4	1	2
332	21.75	18.73	12.7	10.3	11/2020	4	1	2
333	26.11	22.78	13.8	11	11/2020	4	1	2
334	16.06	13.64	11.6	9.2	11/2020	4	0	2
335	28.29	24.25	14.5	11.3	11/2020	4	1	2
336	55.2	36.53	16	13.2	4/2021	4	1	2
337	46.19	28.11	14.5	11.3	4/2021	4	1	2
338	40.3	30.28	13.8	11.2	4/2021	4	0	2
339	48.51	22.44	14.8	12	4/2021	4	1	2
340	53.96	33.96	16.2	12.8	4/2021	4	0	2
341	37.55	20.89	13.5	10.6	4/2021	4	1	2
342	39.52	21.6	13	10.7	4/2021	4	1	2
343	48.83	30.64	15.8	12.3	4/2021	4	1	2
344	35.98	19.19	13.2	10.5	4/2021	4	0	2
345	35.49	18.66	13	10.3	4/2021	4	1	2
346	37.51	20.41	12.8	10	4/2021	4	1	2
347	24.22	8.92	9.7	7.7	4/2021	4	0	2
348	28.83	13.02	11.4	9.2	4/2021	4	1	2
349	47.74	30.44	15.3	11.8	4/2021	4	1	2
350	49.58	31.72	15.5	12.2	4/2021	4	0	2
351	39.53	34.27	15.7	12.8	4/2021	4	0	2
352	31.89	27.03	15	11.8	4/2021	4	1	2
353	32.01	28.18	14.1	11.2	4/2021	4	1	2
354	10.82	9.02	9.8	7.5	4/2021	4	1	2
355	30.53	25.94	13.8	11.2	4/2021	4	0	2
356	19.77	16.95	12	9.8	4/2021	4	1	2
357	25.56	22.17	12.8	10	4/2021	4	1	2
358	22.92	19.44	12.5	10.5	4/2021	4	1	2
359	25.89	21.78	12.5	10.5	4/2021	4	1	2
360	45.01	39.77	16.4	13.1	5/2021	4	0	2
361	30.35	25.82	14.2	11.2	5/2021	4	1	2
362	41.26	30.91	15.5	12.5	5/2021	4	0	2
363	36.19	33.12	15.6	12.5	5/2021	4	1	2
364	37.96	32.16	15.5	12.8	5/2021	4	0	2
365	44.41	39.25	17	13.5	5/2021	4	1	2
366	35.55	31.44	15.7	12.5	5/2021	4	1	2
367	51.39	46.29	16.7	13.5	5/2021	4	0	2
368	31.05	27.19	14.3	11.3	5/2021	4	1	2
369	34.62	31.16	15	12.2	5/2021	4	1	2
370	53.95	50.01	19.5	15.3	5/2021	4	1	2
371	49.39	44.71	18.2	14.4	5/2021	4	1	2
372	38.13	34.03	15.5	12.2	5/2021	4	0	2
373	51.33	44.93	17.6	14	5/2021	4	0	2
374	34.3	31.18	15	11.8	5/2021	4	1	2
375	31.42	27.07	14.8	11.6	5/2021	4	1	2
376	36.44	31.94	14.3	11.4	5/2021	4	1	2
377	28.4	24.45	14.6	11.8	5/2021	4	0	2
378	61.01	53.57	18	14.3	5/2021	4	0	2
379	65.7	58.84	18.5	14.5	5/2021	4	0	2
380	63.49	52.29	19.3	15.5	5/2021	4	0	2
381	34.96	29.73	14.5	11.5	5/2021	4	1	2
382	40.99	35.34	15.8	12.6	5/2021	4	1	2
383	59.07	51.97	18.4	14.6	5/2021	4	1	2
384	28.67	24.08	14.3	11.4	5/2021	4	1	2
385	48.29	42.52	16.9	13.5	3/2021	4	0	2
386	32.46	28.23	14.5	11.5	3/2021	4	0	2
387	35.11	31.11	15.5	12.5	3/2021	4	0	2
388	35.81	25.91	15	12	3/2021	4	1	2
389	27.55	21.36	14	11	3/2021	4	0	2
390	33.31	23.05	14.5	11.5	3/2021	4	0	2
391	31.23	27.8	14.5	11.5	3/2021	4	0	2
392	83.6	70.21	21	16	3/2021	4	0	2
393	49.44	42.21	17	14	3/2021	4	0	2
394	28.18	24.84	14	11	3/2021	4	0	2
395	32.88	26.81	14.5	11.5	3/2021	4	1	2
396	28.16	23.95	16	13.5	3/2021	4	1	2
397	27.47	23.94	13.5	10.5	3/2021	4	1	2
398	31.03	26.71	14.3	11	3/2021	4	1	2
399	39.8	35.76	15.8	12.5	3/2021	4	0	2
400	34.91	28.59	15.3	12.3	3/2021	4	0	2
401	68.82	60.91	19.5	15.5	3/2021	4	0	2
402	32.34	25.76	14	11	3/2021	4	0	2
403	38.35	33.38	16	12.5	3/2021	4	1	2
404	37.93	22.01	16	13.6	3/2021	4	0	2
405	52.55	46.2	17.5	14	3/2021	4	0	2
406	31.6	25.27	17	13.7	3/2021	4	0	2
407	40.51	32.09	15.4	12	3/2021	4	0	2
408	30.33	27.28	14	11.4	3/2021	4	1	2
409	44.38	38.96	16.9	13.5	3/2021	4	1	2
410	31.62	26.68	14	11	3/2021	4	0	2
411	63.2492	54.4782	17.346	13.524	12/2020	4	1	2
412	68.0806	61.0932	18.13	14.504	12/2020	4	0	2
413	105.183	94.4622	20.384	16.366	12/2020	4	0	2
414	63.553	35.2016	19.306	14.504	12/2020	4	0	2
415	95.501	85.505	20.776	16.758	12/2020	4	1	2
416	111.632	94.7562	21.07	16.66	12/2020	4	0	2
417	81.781	72.2554	17.64	14.504	12/2020	4	1	2
418	71.001	61.7988	17.934	14.112	12/2020	4	1	2
419	82.32	73.6274	19.11	14.602	12/2020	4	0	2
420	83.3882	72.9022	19.11	14.602	12/2020	4	0	2
421	64.5428	58.6726	18.522	14.308	12/2020	4	1	2
422	49.6958	45.0016	16.464	12.936	12/2020	4	1	2
423	41.6	36.15	16	12.8	1/2021	4	1	2
424	27.3	23.14	13.8	11.2	1/2021	4	0	2
425	30.17	24.19	14.2	11	1/2021	4	0	2
426	27.51	22.26	13.5	10.9	1/2021	4	1	2
427	23.53	19.7	13	10.3	1/2021	4	1	2
428	27.61	21.83	13.6	10.9	1/2021	4	0	2
429	17.14	14.29	11.6	9.4	1/2021	4	1	2
430	13.44	10.32	10.4	8.3	1/2021	4	1	2
431	11.93	9.86	10.1	8	1/2021	4	1	2
432	7.17	6.18	8.3	6.5	1/2021	4	1	2
433	8.46	6.79	8.8	7.2	1/2021	4	1	2
434	7.81	6.51	8.8	6.9	1/2021	4	1	2
435	9.09	7.43	8.9	7	1/2021	4	1	2
436	6.01	5.22	7.9	6.2	1/2021	4	1	2
437	5.46	4.78	7.6	5.8	1/2021	4	1	2
438	35.49	33.65	14.5	12	1/2021	4	0	2
439	38.11	32.18	15.5	12.2	2/2021	4	0	2
440	30.77	26.52	14	11.2	2/2021	4	1	2
441	61.68	56.72	17	14.3	2/2021	4	0	2
442	53.3	50.6	19.3	16.3	2/2021	4	0	2
443	31.54	29.5	14	11.2	2/2021	4	1	2
444	31.13	28.64	14	11.2	2/2021	4	1	2
445	40.9	36.78	15.5	12.5	2/2021	4	0	2
446	20.74	16.2	12.5	9.8	2/2021	4	0	2
447	69.97	63.16	18.5	15	2/2021	4	1	2
448	29.39	25.32	14.5	11.5	2/2021	4	1	2
449	24.64	20.36	12.5	10.3	2/2021	4	0	2
450	31.88	26.52	14.5	11.5	2/2021	4	1	2
451	29.65	23.6	14	11.5	2/2021	4	1	2
452	30.1	26.1	14	11	2/2021	4	1	2
453	29.58	24.23	13.6	11	2/2021	4	0	2
454	12.19	10.62	10.1	8.2	2/2021	4	0	2
455	38.51	33.46	16	12.8	3/2021	3	0	2
456	44.81	35.17	16	12.7	3/2021	3	0	2
457	68.92	62.18	20	15.7	3/2021	3	0	2
458	52.48	45.98	18.9	15	3/2021	3	1	2
459	47.56	42.04	17.5	13.5	3/2021	3	0	2
460	58.59	46.3	18.4	14.5	3/2021	3	0	2
461	66.55	59.04	19.5	15.5	3/2021	3	1	2
462	38.99	30.22	15	12	4/2021	3	1	2
463	35.31	25.27	15.12	13.9	4/2021	3	0	2
464	31.65	28.67	13.7	11	4/2021	3	1	2
465	30.15	28.64	14.4	11.3	4/2021	3	1	2
466	33.74	29.55	14.9	11.6	4/2021	3	1	2
467	29.15	25.36	13.7	10.5	4/2021	3	0	2
468	46.81	42.39	16.4	13	4/2021	3	1	2
469	36.85	21.45	15	12	4/2021	3	1	2
470	26.69	23.55	13.9	11	4/2021	3	1	2
471	35.43	28.44	15.4	12	4/2021	3	0	2
472	33.92	29.22	15.2	12.2	4/2021	3	0	2
473	27.3	21.4	15	13.3	4/2021	3	1	2
474	31.59	28.44	14.9	12	4/2021	3	1	2
475	45.37	40.32	16.8	13.4	4/2021	3	1	2
476	56.94	36	18	14.5	4/2021	3	1	2
477	53.76	48.6	17.4	14.3	4/2021	3	1	2
478	59.06	50.16	17.8	14.4	4/2021	3	1	2
479	26.45	22.76	13.7	11	4/2021	3	1	2
480	81.68	69.78	19.5	16	4/2021	3	0	2
481	44.26	42.6	16.2	13.1	12/2020	3	1	2
482	69.6	54.3	18.6	14.6	12/2020	3	0	2
483	61.96	55.2	19.2	15.1	12/2020	3	0	2
484	45.5	44.2	15.2	12.1	12/2020	3	0	2
485	50.63	46.8	17	13.4	12/2020	3	1	2
486	54.98	50	17.5	13.8	12/2020	3	0	2
487	53.27	49.2	17	13.6	12/2020	3	1	2
488	38.74	32	15.6	12.8	12/2020	3	1	2
489	51	49	17.5	14	12/2020	3	0	2
490	25.78	22.6	14	11.2	12/2020	3	0	2
491	43.12	39.6	16.5	13.4	12/2020	3	0	2
492	45.15	40.16	16.5	13.2	12/2020	3	1	2
493	26.46	22.56	14	13.2	12/2020	3	1	2
494	49.76	45.23	16	12.6	12/2020	3	0	2
495	46.85	43.72	15.8	13	12/2020	3	0	2
496	35.45	33.23	15.5	12.3	12/2020	3	1	2
497	35.63	32.52	15	12	12/2020	3	0	2
498	60.97	56.63	17.5	14.2	12/2020	3	1	2
499	48.16	43.52	16.6	13.2	12/2020	3	0	2
500	42.22	38.65	16.5	13.3	12/2020	3	0	2
501	47.71	42.24	16.3	12.8	12/2020	3	0	2
502	59.11	53.98	17.2	13.5	11/2020	3	0	2
503	35.79	32.22	16.2	12.5	11/2020	3	0	2
504	24.05	20.16	13	10.2	11/2020	3	1	2
505	52.02	49.6	16.5	13	11/2020	3	1	2
506	29.13	26.6	14.5	11.5	11/2020	3	1	2
507	34.69	30.83	14.5	11.8	11/2020	3	0	2
508	21.05	19.12	12.5	9.8	11/2020	3	0	2
509	19.88	16.42	12	9.8	11/2020	3	1	2
510	32.65	29.67	15	11.5	11/2020	3	1	2
511	21.61	17.53	12.5	10.2	11/2020	3	1	2
512	73.19	62.33	21.7	17.6	11/2020	3	0	2
513	59.99	51.92	18	14.5	11/2020	3	0	2
514	52.26	47.3	17.8	14.5	11/2020	3	1	2
515	53.72	46.57	18.2	14.3	11/2020	3	0	2
516	64.41	56.54	19.5	15.4	11/2020	3	1	2
517	47.08	42.2	16.8	13.4	11/2020	3	1	2
518	44.74	38.9	16.5	13.4	11/2020	3	1	2
519	38.3	31.9	15.5	12.2	11/2020	3	1	2
520	22.42	18.98	12.8	10.4	10/2021	3	1	2
521	23.33	20.17	13.2	10.5	10/2021	3	1	2
522	18.85	16.35	12	9.5	10/2021	3	1	2
523	15.2	13.32	11.3	8.9	10/2021	3	0	2
524	19.15	16.85	12.6	10	10/2021	3	0	2
525	16.15	13.96	12	9.6	10/2021	3	1	2
526	17.93	16.03	12.1	9.7	10/2021	3	1	2
527	16.36	14.51	11.5	9.2	10/2021	3	0	2
528	19.42	16.84	12	9.6	10/2021	3	1	2
529	19.55	17.05	12.4	9.8	10/2021	3	1	2
530	21.09	18.42	13.3	10.7	10/2021	3	0	2
531	22.52	19.9	12.9	10.5	10/2021	3	1	2
532	18.61	16.1	12.2	9.7	10/2021	3	1	2
533	18.26	15.73	12.3	9.8	10/2021	3	1	2
534	18.18	15.66	11.6	9.4	10/2021	3	0	2
535	16.55	14.47	12	9.5	10/2021	3	0	2
536	17.68	15.66	11.7	8.9	10/2021	3	1	2
537	14.05	12.12	11.3	9.2	10/2021	3	1	2
538	12.27	10.52	10.9	8.5	10/2021	3	1	2
539	14.75	12.85	11.2	9	10/2021	3	1	2
540	17.99	15.29	11.8	9.4	10/2021	3	0	2
541	15.06	13.17	11.3	9.1	10/2021	3	0	2
542	11.09	9.43	10.4	8.2	10/2021	3	1	2
543	225.92	192.26	26.7	23.1	1/2021	3	0	2
544	134.86	126.18	22.5	18	1/2021	3	1	2
545	105.14	98.56	21.7	17.2	1/2021	3	1	2
546	97.93	88.29	19.9	15.6	1/2021	3	1	2
547	106.63	98.61	22.4	18.2	1/2021	3	1	2
548	71.65	64.11	18.5	15.6	1/2021	3	1	2
549	55.55	42.99	17.6	14.1	1/2021	3	0	2
550	41.47	37.7	16.6	13	1/2021	3	1	2
551	33.4	29.72	15.8	12.7	1/2021	3	1	2
552	38.48	30.81	15.6	12.7	1/2021	3	0	2
553	52.51	46.12	17.6	14	1/2021	3	1	2
554	34.9	27.74	15.4	12	1/2021	3	0	2
555	32.52	28.7	15.5	12	1/2021	3	1	2
556	36.86	33.08	16.3	12.9	1/2021	3	1	2
557	32.4	28.57	15.7	12.8	1/2021	3	0	2
558	27.36	23.71	14.7	11.8	1/2021	3	1	2
559	64.54	55.59	17.7	13.8	2/2021	3	0	2
560	69.47	62.34	18.5	14.8	2/2021	3	0	2
561	107.33	96.39	20.8	16.7	2/2021	3	0	2
562	64.85	35.92	19.7	14.8	2/2021	3	0	2
563	97.45	87.25	21.2	17.1	2/2021	3	0	2
564	113.91	96.69	21.5	17	2/2021	3	0	2
565	83.45	73.73	18	14.8	2/2021	3	0	2
566	72.45	63.06	18.3	14.4	2/2021	3	1	2
567	84	75.13	19.5	14.9	2/2021	3	1	2
568	85.09	74.39	19.5	14.9	2/2021	3	1	2
569	65.86	59.87	18.9	14.6	2/2021	3	1	2
570	50.71	45.92	16.8	13.2	2/2021	3	1	2
571	34.4092	23.8106	14.9785	11.8795	5/2021	3	0	2
572	51.0715	43.6029	17.561	14.462	5/2021	3	0	2
573	29.1099	25.6597	14.462	11.363	5/2021	3	0	2
574	33.965	27.6947	14.9785	11.8795	5/2021	3	1	2
575	33.4072	26.6101	14.462	11.363	5/2021	3	0	2
576	39.6155	34.4815	16.528	12.9125	5/2021	3	1	2
577	45.8445	40.2457	17.4577	13.9455	5/2021	3	1	2
578	32.6635	27.5604	14.462	11.363	5/2021	3	0	2
579	42.6216	31.93	16.0115	12.9125	5/2021	3	0	2
580	39.2127	33.2213	16.0115	13.2224	5/2021	3	0	2
581	45.8755	40.5452	17.561	13.9455	5/2021	3	1	2
582	36.7231	32.4775	16.2181	12.9125	5/2021	3	1	2
583	53.0239	46.4127	18.1808	14.462	5/2021	3	0	2
584	35.4319	32.2089	15.495	12.1894	5/2021	3	1	2
585	29.3372	25.2568	15.0818	12.1894	5/2021	3	0	2
586	65.5852	54.0156	19.9369	16.0115	5/2021	3	0	2
587	36.1137	30.7111	14.9785	11.8795	5/2021	3	1	2
588	42.3427	36.5062	16.3214	13.0158	5/2021	3	1	2
589	50.39	39.82	15.8	12.5	6/2021	1	0	2
590	57.23	50.77	16.8	13.3	6/2021	1	1	2
591	33.53	25.99	12.9	10.3	6/2021	1	1	2
592	30.37	21.73	13	10.8	6/2021	1	0	2
593	27.22	22.36	11.8	9.5	6/2021	1	1	2
594	25.93	21.68	12.4	9.7	6/2021	1	1	2
595	29.02	25.41	12.8	10	6/2021	1	1	2
596	25.07	21.81	11.8	9	6/2021	1	0	2
597	40.26	36.46	14.1	11.2	6/2021	1	1	2
598	31.69	18.45	12.9	10.3	6/2021	1	1	2
599	22.95	20.25	12	9.5	6/2021	1	1	2
600	30.47	24.46	13.2	10.3	6/2021	1	0	2
601	29.17	25.13	13.1	10.5	6/2021	1	1	2
602	23.48	18.4	13.9	11.6	6/2021	1	1	2
603	27.17	24.46	12.8	10.3	6/2021	1	1	2
604	39.02	34.65	14.4	11.5	6/2021	1	1	2
605	48.97	30.96	15.5	12.5	6/2021	1	1	2
606	46.23	41.8	15	12.3	6/2021	1	1	2
607	51.26	43.14	15.3	12.4	6/2021	1	1	2
608	22.75	19.57	11.8	9.5	6/2021	1	1	2
609	70.24	60.01	16.8	13.8	6/2021	1	0	2
610	54.44	52.4	19.93	16.1	6/2021	1	1	2
611	85.61	66.79	22.88	18	6/2021	1	0	2
612	76.21	67.9	23.62	18.6	6/2021	1	1	2
613	55.97	54.37	18.7	14.9	6/2021	1	0	2
614	62.27	57.56	20.91	16.5	7/2021	1	1	2
615	67.63	61.5	21.53	17	7/2021	1	0	2
616	65.52	60.52	20.91	16.7	7/2021	1	0	2
617	62.73	60.27	21.53	17.2	7/2021	1	1	2
618	31.71	27.8	17.22	13.8	7/2021	1	1	2
619	53.04	48.71	20.3	16.5	7/2021	1	0	2
620	55.53	49.4	20.3	16.2	7/2021	1	1	2
621	32.55	27.75	17.22	16.2	7/2021	1	1	2
622	61.2	55.63	19.68	15.5	7/2021	1	0	2
623	57.63	53.78	19.43	16	7/2021	1	0	2
624	43.6	40.87	19.07	15.1	7/2021	1	1	2
625	43.82	40	18.45	14.8	7/2021	1	0	2
626	74.99	69.65	21.53	17.5	7/2021	1	0	2
627	59.24	53.53	20.42	16.2	7/2021	1	1	2
628	51.93	46.21	20.3	16.4	7/2021	1	0	2
629	58.68	51.96	20.05	15.7	7/2021	1	0	2
630	72.71	66.4	21.16	16.6	7/2021	1	0	2
631	44.02	39.63	19.93	15.4	7/2021	1	0	2
632	29.58	24.8	15.99	12.5	7/2021	1	1	2
633	63.98	61.01	20.3	16	7/2021	1	1	2
634	35.83	32.72	17.84	14.1	7/2021	1	1	2
635	42.67	37.92	17.84	14.5	8/2021	1	0	2
636	25.89	23.52	15.38	12.1	8/2021	1	0	2
637	24.45	20.2	14.76	12.1	8/2021	1	1	2
638	40.16	36.49	18.45	14.1	8/2021	1	1	2
639	26.58	21.56	15.38	12.5	8/2021	1	1	2
640	90.02	76.67	26.69	24.2	8/2021	1	0	2
641	73.79	63.86	22.14	17.8	8/2021	1	0	2
642	64.28	58.18	21.89	17.8	8/2021	1	1	2
643	66.08	57.28	22.39	17.6	8/2021	1	0	2
644	79.22	69.54	23.99	20.1	8/2021	1	1	2
645	57.91	51.91	20.66	16.5	8/2021	1	1	2
646	55.03	47.85	20.3	16.5	8/2021	1	1	2
647	47.11	39.24	19.07	15	8/2021	1	1	2
648	27.58	23.35	15.74	12.8	8/2021	1	1	2
649	28.7	24.81	16.24	12.9	8/2021	1	1	2
650	23.19	20.11	14.76	11.7	8/2021	1	1	2
651	18.7	16.38	13.9	10.9	8/2021	1	1	2
652	23.55	20.73	15.5	12.3	8/2021	1	1	2
653	19.86	17.17	14.76	11.8	8/2021	1	1	2
654	22.05	19.72	14.88	11.9	9/2021	1	1	2
655	20.12	17.85	14.15	11.3	9/2021	1	0	2
656	23.89	20.71	14.76	11.8	9/2021	1	1	2
657	24.05	20.97	15.25	12.1	9/2021	1	1	2
658	25.94	22.66	16.36	13.2	9/2021	1	0	2
659	27.7	24.48	15.87	12.9	9/2021	1	1	2
660	22.89	19.8	15.01	11.9	9/2021	1	1	2
661	22.46	19.35	15.13	12.1	9/2021	1	0	2
662	22.36	19.26	14.27	11.6	9/2021	1	0	2
663	20.36	17.8	14.76	11.7	9/2021	1	0	2
664	21.75	19.26	14.39	10.9	9/2021	1	1	2
665	17.28	14.91	13.9	11.3	9/2021	1	1	2
666	15.09	12.94	13.41	10.5	9/2021	1	1	2
667	18.14	15.81	13.78	11.1	9/2021	1	1	2
668	22.13	18.81	14.51	11.6	9/2021	1	0	2
669	18.52	16.2	13.9	11.2	9/2021	1	1	2
670	125.07	113.89	26.94	23.6	6/2021	2	0	2
671	151.36	138.22	29.45	26.7	6/2021	2	0	2
672	73.02	66.42	22.8	18.6	6/2021	2	0	2
673	160.91	130.21	26.94	24.3	6/2021	2	0	2
674	177.98	158.62	29.45	26.8	6/2021	2	0	2
675	37.99	34.11	18.8	14.5	6/2021	2	0	2
676	37.67	32.83	17.54	14	6/2021	2	1	2
677	35.48	27.27	16.29	12.9	6/2021	2	0	2
678	40.54	37.81	19.36	15.5	6/2021	2	1	2
679	55.11	50.59	23.88	19.4	6/2021	2	1	2
680	39.36	29.03	21.94	17.4	6/2021	2	1	2
681	65.01	56.32	22.46	18.3	6/2021	2	1	2
682	52.04	47.13	20.65	16.5	6/2021	2	1	2
683	53.06	48.13	20.65	16.8	6/2021	2	1	2
684	40.96	35.66	18.07	15	6/2021	2	1	2
685	18.03	16.7	13.55	12.4	6/2021	2	1	2
686	171.3	155.64	26.31	23.8	6/2021	2	0	2
687	114.59	104.96	26.06	23.6	6/2021	2	0	2
688	76.66	70.17	23.81	18.8	6/2021	2	1	2
689	90.88	81.81	24.43	20.4	6/2021	2	1	2
690	107.96	94.03	23.81	18.8	6/2021	2	1	2
691	172.8	159.12	30.07	28.3	6/2021	2	0	2
692	63.13	49.23	19.8	15.7	6/2021	2	0	2
693	60.18	54.93	21.8	17.3	6/2021	2	0	2
694	31.2	24.56	16.92	13.8	6/2021	2	1	2
695	25.94	18.19	16.29	13.2	7/2021	2	0	2
696	59.77	53.5	19.42	16.3	7/2021	2	1	2
697	62.79	56.57	20.67	16.9	7/2021	2	1	2
698	116.78	109.89	28.19	25.1	7/2021	2	0	2
699	31.07	28.38	17.54	13.8	7/2021	2	1	2
700	58.54	51.27	21.68	18.5	7/2021	2	1	2
701	73.13	68.33	23.18	18.2	7/2021	2	1	2
702	93.46	74.73	24.43	20	7/2021	2	0	2
703	68.21	62.69	21.93	17.5	7/2021	2	1	2
704	82.42	75.87	23.81	18.8	7/2021	2	1	2
705	177.71	163	30.07	27.2	7/2021	2	0	2
706	119.87	111.28	26.94	23.4	7/2021	2	0	2
707	163.07	145.7	28.19	24.3	7/2021	2	0	2
708	106.89	97.28	25.06	23.5	7/2021	2	0	2
709	39.77	34.62	17.54	14.5	7/2021	2	1	2
710	17.5	16.21	13.16	12	7/2021	2	1	2
711	81.05	70.92	22.33	18.7	7/2021	2	0	2
712	66.98	63.7	22.33	18.3	7/2021	2	1	2
713	72.52	65.19	22.07	18.2	7/2021	2	1	2
714	73.36	65.69	21.94	18.1	7/2021	2	0	2
715	65.55	58.9	22.07	18.3	7/2021	2	0	2
716	61.23	54.57	21.29	18.2	7/2021	2	0	2
717	56.33	49.09	20.26	16.9	7/2021	2	1	2
718	102.15	94.79	29.19	26.3	7/2021	2	1	2
719	54.63	49.22	21.29	17.2	7/2021	2	0	2
720	92.78	85.4	24.43	19.4	7/2021	2	1	2
721	167.99	152.26	31.33	28.3	7/2021	2	0	2
722	185.69	168.22	29.45	25.9	8/2021	2	1	2
723	216.92	163.21	28.82	23.8	8/2021	2	0	2
724	159.38	141.26	28.19	26.3	8/2021	2	0	2
725	234.19	212.17	32.58	29.2	8/2021	2	1	2
726	183.94	164.97	28.82	24.3	8/2021	2	0	2
727	152.74	139.62	28.19	24.6	8/2021	2	1	2
728	187.7	168.79	29.45	26.4	8/2021	2	0	2
729	135.29	118.06	27.57	23.4	8/2021	2	1	2
730	147.54	117.23	28.82	25.8	8/2021	2	0	2
731	129.03	102.88	27.32	24.3	8/2021	2	0	2
732	130.47	114.09	26.94	21.9	8/2021	2	1	2
733	126.55	99.98	25.06	20.3	8/2021	2	0	2
734	51.45	44.77	19.42	16	8/2021	2	1	2
735	66.45	57.21	23.18	18.2	8/2021	2	1	2
736	41.2	36.09	18.17	14.8	8/2021	2	1	2
737	36.04	32.63	18.17	14.8	8/2021	2	1	2
738	65.37	59.53	22.55	17.9	8/2021	2	1	2
739	47.34	41.32	19.8	16.5	8/2021	2	1	2
740	108.11	98.85	26.31	23.7	8/2021	2	1	2
741	38.22	27.32	21.3	16.9	8/2021	2	1	2
742	63.11	54.68	21.8	17.8	8/2021	2	1	2
743	50.52	45.76	20.05	16	8/2021	2	1	2
744	51.51	46.72	20.05	16.3	8/2021	2	1	2
745	49.54	44.64	19.42	15.5	8/2021	2	1	2
746	49.17	44.67	19.05	15.8	8/2021	2	1	2
747	67.04	60.19	21.05	17	8/2021	2	1	2
748	48.67	40.03	18.8	15.4	8/2021	2	0	2
749	42.04	38.62	16.92	13.3	8/2021	2	1	2
750	45.68	36.79	18.8	14.9	9/2021	2	0	2
751	29.28	25.45	16.29	13.2	9/2021	2	1	2
752	31.56	27.33	17.54	14.4	9/2021	2	1	2
753	28.88	25.21	16.16	12.5	9/2021	2	1	2
754	31.12	27.32	16.29	13.2	9/2021	2	1	2
755	18.02	15.3	13.78	10.7	9/2021	2	1	2
756	25.27	22.04	15.04	12.5	9/2021	2	1	2
757	17.54	15.21	13.78	11	9/2021	2	1	2
758	30.55	26.21	16.29	13.5	9/2021	2	1	2
759	31.11	27.59	16.92	13.5	9/2021	2	1	2
760	19.63	16.92	14.41	11.8	9/2021	2	1	2
761	22.22	18.8	15.04	11.9	9/2021	2	1	2
762	32.14	25.3	17.42	14.2	9/2021	2	1	2
763	26.72	19.04	16.78	13.6	9/2021	2	0	2
764	61.56	55.11	20	16.8	9/2021	2	1	2
765	64.67	58.27	21.29	17.4	9/2021	2	1	2
766	120.28	113.18	29.04	26.9	9/2021	2	0	2
767	32.01	29.23	18.07	14.2	9/2021	2	1	2
768	60.3	52.81	22.33	19.1	9/2021	2	1	2
769	82.96	66.26	23.75	20.7	9/2021	2	0	2
770	37.12	33.61	18.71	15.2	9/2021	2	1	2
771	67.33	61.32	23.23	18.5	9/2021	2	1	2
772	48.76	42.56	20.39	17	9/2021	2	1	2
773	111.35	101.81	27.1	25.3	9/2021	2	1	2
774	20.74	17.68	14.79	12	9/2021	2	1	2
775	17.19	14.65	14.41	11.5	9/2021	2	1	2
776	17.22	14.67	14.41	11.3	9/2021	2	1	2
777	21.6	18.23	15.04	12.3	6/2021	3	1	2
778	15	12.39	13.53	11	6/2021	3	1	2
779	22.49	18.73	15.66	12.5	6/2021	3	1	2
780	28.31	24.37	16.29	13.2	6/2021	3	1	2
781	8.87	7.12	11.03	8.9	6/2021	3	1	2
782	80.87	69.65	22.18	17.3	6/2021	3	1	2
783	87.05	78.11	23.18	18.5	6/2021	3	0	2
784	134.48	120.78	26.06	24.9	6/2021	3	0	2
785	81.26	45.01	24.68	22.6	6/2021	3	0	2
786	111.2	100.3	25.3	23.1	6/2021	3	1	2
787	31.11	27.59	16.92	13.5	6/2021	3	1	2
788	19.63	16.92	14.41	11.8	6/2021	3	1	2
789	22.22	18.8	15.04	11.9	6/2021	3	1	2
790	20.74	17.68	14.79	12	6/2021	3	1	2
791	17.19	14.65	14.41	11.5	6/2021	3	1	2
792	17.22	14.67	14.41	11.3	6/2021	3	1	2
793	21.6	18.23	15.04	12.3	6/2021	3	1	2
794	15	12.39	13.53	11	6/2021	3	1	2
795	22.49	18.73	15.66	12.5	6/2021	3	1	2
796	28.31	24.37	16.29	13.2	6/2021	3	1	2
797	8.87	7.12	11.03	8.9	7/2021	3	1	2
798	80.87	69.65	22.18	17.3	7/2021	3	1	2
799	87.05	78.11	23.18	18.5	7/2021	3	0	2
800	132.32	118.32	25.36	23.9	7/2021	3	0	2
801	104.56	92.38	22.55	18.5	7/2021	3	1	2
802	90.78	79.01	22.93	18	7/2021	3	1	2
803	105.25	94.14	24.43	21.6	7/2021	3	0	2
804	72.39	65.13	22.18	17.9	7/2021	3	0	2
805	70.33	62.62	22.93	18.2	7/2021	3	1	2
806	70.32	60.23	20.3	17.2	7/2021	3	1	2
807	81.6	73.38	23.18	18.2	7/2021	3	1	2
808	65.66	58.97	21.8	16.9	7/2021	3	1	2
809	56.57	50.97	21.93	16.9	7/2021	3	1	2
810	76.36	65.58	22.55	19.3	7/2021	3	0	2
811	60.36	55.58	21.3	16.9	7/2021	3	0	2
812	59.56	53.11	21.3	16.9	8/2021	3	0	2
813	55.71	50.9	20.67	16.3	8/2021	3	0	2
814	67.04	60.57	21.3	16.9	8/2021	3	0	2
815	47.93	41.27	19.55	15.8	8/2021	3	1	2
816	66.32	58.09	21.55	17.7	8/2021	3	1	2
817	80.82	70.47	23.93	19.2	8/2021	3	0	2
818	89.3	82.36	22.36	20.31	8/2021	3	0	2
819	104.91	93.89	26.31	21.3	8/2021	3	1	2
820	65.66	58.97	21.8	16.9	8/2021	3	0	2
821	56.57	50.97	21.93	16.9	8/2021	3	1	2
822	76.36	65.58	22.55	18.3	8/2021	3	0	2
823	60.36	55.58	21.3	16.9	8/2021	3	0	2
824	94.25	84.04	24.43	20	8/2021	3	0	2
825	104.91	93.89	26.31	21.3	8/2021	3	1	2
826	51.51	44.92	20.55	16.5	8/2021	3	0	2
827	80.47	71.26	23.56	19	8/2021	3	0	2
828	50.58	44.58	20.42	16.4	8/2021	3	1	2
829	52.56	46.56	21.05	16.8	9/2021	3	1	2
830	59.32	34.14	22.55	18.2	9/2021	3	0	2
831	89.97	80.58	24.43	20.1	9/2021	3	0	2
832	58.95	52.96	20.05	15.7	9/2021	3	0	2
833	61.02	54.39	21.05	16.3	9/2021	3	1	2
834	74.25	61.35	22.3	17.5	9/2021	3	0	2
835	63.5	56.85	21.3	17.3	9/2021	3	0	2
836	59.56	53.11	21.3	16.9	9/2021	3	0	2
837	55.71	50.9	20.67	16.3	9/2021	3	1	2
838	67.04	60.57	21.3	16.9	9/2021	3	0	2
839	51.51	44.92	20.55	16.5	9/2021	3	0	2
840	83.44	75.71	23.81	18.8	9/2021	3	1	2
841	39.96	34.67	18.17	14.4	9/2021	3	0	2
842	129.02	105.59	25.19	21.6	9/2021	3	0	2
843	80.52	73.18	21.68	18	9/2021	3	1	2
844	78.1	70.71	22.18	18.5	9/2021	3	1	2
845	77.67	70.23	20.93	18.3	9/2021	3	1	2
846	72.99	66.1	21.55	17.8	9/2021	3	1	2
847	72.61	65.54	21.43	17.7	9/2021	3	1	2
848	72.44	65.36	22.05	17.8	9/2021	3	1	2
849	67.1	59.47	21.3	18.7	9/2021	3	1	2
850	69.68	62.24	21.43	17.8	9/2021	3	1	2
851	78.69	68.85	21.68	18.2	9/2021	3	0	2
852	65.03	61.85	21.68	17.8	6/2021	4	1	2
853	70.41	63.29	21.43	17.7	6/2021	4	1	2
854	71.22	63.78	21.3	17.5	6/2021	4	0	2
855	63.64	57.19	21.43	17.8	6/2021	4	0	2
856	59.44	52.98	20.67	15.7	6/2021	4	0	2
857	54.69	47.66	19.67	16.4	6/2021	4	1	2
858	99.17	92.03	30.2	26.3	6/2021	4	1	2
859	53.04	47.79	20.67	16.7	6/2021	4	0	2
860	39.36	36.71	18.8	15	6/2021	4	1	2
861	53.5	49.12	23.18	18.8	6/2021	4	1	2
862	80.47	71.26	23.56	19	6/2021	4	0	2
863	50.58	44.58	20.42	16.4	6/2021	4	1	2
864	52.56	46.56	21.05	16.8	6/2021	4	1	2
865	59.32	34.14	22.55	18.2	6/2021	4	0	2
866	89.97	80.58	24.43	20.1	6/2021	4	0	2
867	58.95	52.96	20.05	15.7	6/2021	4	0	2
868	51.03	45.98	20	16	6/2021	4	1	2
869	50.64	46.01	19.62	16.3	6/2021	4	1	2
870	69.05	62	21.68	17.6	6/2021	4	1	2
871	50.13	41.23	19.36	15.9	6/2021	4	0	2
872	43.3	39.78	17.42	13.7	6/2021	4	1	2
873	47.05	37.89	19.36	15.4	7/2021	4	0	2
874	62.05	57.97	21.29	17.8	7/2021	4	1	2
875	39.13	35.13	19.36	15	7/2021	4	0	2
876	38.8	33.81	18.07	14.5	7/2021	4	1	2
877	36.55	28.08	16.78	13.3	7/2021	4	0	2
878	61.02	54.39	21.05	16.3	7/2021	4	1	2
879	74.25	61.35	22.3	17.5	7/2021	4	0	2
880	63.5	56.85	21.3	17.3	7/2021	4	1	2
881	75.51	60.14	21.8	17.3	7/2021	4	0	2
882	66.06	54.92	21.18	16.9	7/2021	4	0	2
883	66.06	54.92	21.18	16.9	7/2021	4	0	2
884	58.25	51.9	20.67	16	7/2021	4	0	2
885	80.54	64.33	23.06	18.2	7/2021	4	0	2
886	60.24	56.28	20.67	17.3	7/2021	4	1	2
887	75.89	67.56	22.76	18.4	7/2021	4	0	2
888	76.01	68.39	23.29	18.8	7/2021	4	0	2
889	73.85	65.76	24.08	19.1	7/2021	4	1	2
890	78.02	69.81	24.34	21.3	7/2021	4	1	2
891	85.68	77.04	24.34	21.6	7/2021	4	0	2
892	98.96	88.24	25.66	21.1	7/2021	4	0	2
893	110.16	98.58	27.63	24.6	8/2021	4	1	2
894	68.94	61.91	22.89	19.5	8/2021	4	0	2
895	58.25	51.9	20.67	16	8/2021	4	0	2
896	63.13	49.23	19.8	15.7	8/2021	4	0	2
897	60.18	54.93	21.8	17.3	8/2021	4	0	2
898	83.44	75.71	23.81	18.8	8/2021	4	1	2
899	39.96	34.67	18.17	14.4	8/2021	4	0	2
900	126.55	99.98	25.06	20.3	8/2021	4	0	2
901	51.45	44.77	19.42	16	8/2021	4	1	2
902	66.45	57.21	23.18	18.2	8/2021	4	1	2
903	41.2	36.09	18.17	14.8	8/2021	4	1	2
904	29.28	25.45	16.29	13.2	8/2021	4	1	2
905	31.56	27.33	17.54	14.4	8/2021	4	1	2
906	28.88	25.21	16.16	12.5	8/2021	4	1	2
907	31.12	27.32	16.29	13.2	8/2021	4	1	2
908	18.02	15.3	13.78	10.7	8/2021	4	1	2
909	25.27	22.04	15.04	12.5	8/2021	4	1	2
910	17.54	15.21	13.78	11	8/2021	4	1	2
911	30.55	26.21	16.29	13.5	8/2021	4	1	2
912	134.48	120.78	26.06	23.4	8/2021	4	0	2
913	81.26	45.01	24.68	20.1	8/2021	4	0	2
914	122.1	109.32	26.56	23.3	8/2021	4	1	2
915	142.73	121.15	26.94	22.3	8/2021	4	0	2
916	104.56	92.38	22.55	18.5	8/2021	4	1	2
917	90.78	79.01	22.93	18	9/2021	4	1	2
918	105.25	94.14	24.43	20.1	9/2021	4	0	2
919	106.62	93.21	24.43	21.6	9/2021	4	0	2
920	82.52	75.02	23.68	20.1	9/2021	4	1	2
921	63.54	57.54	21.05	16.5	9/2021	4	1	2
922	64.54	56.37	21.93	17.5	9/2021	4	0	2
923	106.62	93.21	24.43	20.4	9/2021	4	0	2
924	82.52	75.02	23.68	19.3	9/2021	4	1	2
925	63.54	57.54	21.05	16.5	9/2021	4	1	2
926	64.54	56.37	21.93	17.5	9/2021	4	0	2
927	62.1	57.74	21.3	16.9	9/2021	4	0	2
928	72.27	64.34	21.68	17.5	9/2021	4	0	2
929	62.1	57.74	21.3	16.9	9/2021	4	0	2
930	72.27	64.34	21.68	17.5	9/2021	4	1	2
931	72.39	65.13	22.18	17.9	9/2021	4	1	2
932	70.33	62.62	22.93	18.2	9/2021	4	1	2
933	74.3	66.48	23.18	18.2	9/2021	4	1	2
934	81.6	73.38	23.18	18.2	9/2021	4	0	2
935	75.51	60.14	21.8	17.3	9/2021	4	0	2
936	59.4	53.52	23.02	19.8	9/2021	4	1	2
937	80.18	68.86	23.68	19.9	9/2021	4	0	2
938	63.37	58.36	22.37	17.8	9/2021	4	0	2
939	79.28	63.15	22.89	18.2	9/2021	4	0	2
940	69.36	57.66	22.23	17.8	9/2021	4	0	2
941	61.16	54.49	21.71	16.8	9/2021	4	0	2
942	66.28	51.69	20.79	16.4	9/2021	4	0	2
943	39.02	33.65	15.1	12.7	11/2021	1	1	2
944	28.04	24.03	14.6	12	11/2021	1	1	2
945	25.98	22.7	13.6	11.3	11/2021	1	1	2
946	41.48	33.96	16.6	13.5	11/2021	1	0	2
947	160.11	123.18	23.1	19.9	11/2021	1	0	2
948	44.43	34.9	16.1	13.3	11/2021	1	0	2
949	36.37	32.04	15.4	12.7	11/2021	1	1	2
950	19.28	16.85	13	10.4	11/2021	1	1	2
951	37.87	29.5	15.1	12.3	11/2021	1	0	2
952	36.93	31.57	14.9	12.3	11/2021	1	1	2
953	43.22	33.38	15.5	12.9	11/2021	1	0	2
954	32.14	28.22	14.2	12	11/2021	1	1	2
955	40.98	33.18	15.8	12.9	11/2021	1	0	2
956	34.7	31.49	14.8	12.4	11/2021	1	1	2
957	18.14	15.65	11.9	9.7	11/2021	1	1	2
958	22.47	19.27	13.8	11.4	11/2021	1	1	2
959	18.77	16.65	11.5	9.5	11/2021	1	1	2
960	21.16	18.01	11.8	9.4	11/2021	1	1	2
961	40.04	34	15.9	13.2	11/2021	1	0	2
962	24.18	20.96	13.1	17	11/2021	1	1	2
963	39.8	35.82	16.9	14	11/2021	1	0	2
964	42.16	37.58	17.7	14.6	11/2021	1	0	2
965	13.22	11.22	10.7	8.7	11/2021	1	1	2
966	27.05	22.91	13.2	10.7	11/2021	1	1	2
967	31.5	27.78	15.2	12.3	11/2021	1	1	2
968	47.92	42.65	17	14.1	11/2021	1	1	2
969	40.81	35.45	16.5	13.4	11/2021	2	1	2
970	29.97	25.77	14	11.8	11/2021	2	1	2
971	42.28	36.7	16.5	14.2	11/2021	2	1	2
972	35.15	30.97	15.5	12.8	11/2021	2	1	2
973	28.38	24.98	13.9	11.3	11/2021	2	1	2
974	34.54	31.08	16	13.3	11/2021	2	1	2
975	39.47	33.79	16.3	13.5	11/2021	2	1	2
976	48.93	43.45	16	13.8	11/2021	2	1	2
977	37.02	32.26	16.1	13.3	11/2021	2	1	2
978	14.75	12.69	11.4	9.3	11/2021	2	1	2
979	39.14	32.5	15.6	13	11/2021	2	1	2
980	22.28	19.11	12.8	10.6	11/2021	2	1	2
981	74.51	66.53	19.7	16.2	11/2021	2	1	2
982	51.25	40.41	17.3	14.4	11/2021	2	0	2
983	147.27	124.48	23.6	20.4	11/2021	2	0	2
984	164.75	133.53	26.2	22.3	11/2021	2	0	2
985	69.05	58.95	18.5	15.3	11/2021	3	0	2
986	176.65	151.12	25.5	21.4	11/2021	3	0	2
987	66.66	57.17	19	15	11/2021	3	1	2
988	115.03	100.09	22.5	10.85	11/2021	3	1	2
989	116	101.38	22.5	18	11/2021	3	1	2
990	111.85	97.32	22.7	18	11/2021	3	1	2
991	96.5	83.67	22.5	17.7	11/2021	3	1	2
992	39.04	35.76	15.5	12.6	11/2021	3	1	2
993	97.65	85.82	21.6	17	11/2021	3	1	2
994	27.01	23.97	14	10.3	11/2021	3	1	2
995	26.42	22.42	14	11	11/2021	3	1	2
996	97.48	87.54	21	17	11/2021	3	0	2
997	42.58	37.69	16	13	11/2021	3	1	2
998	90.02	78.52	20.5	16	11/2021	3	0	2
999	90.67	80.89	20.5	17	11/2021	3	0	2
1000	88.33	66.71	20.5	17.3	11/2021	3	0	2
1001	77.98	68.55	21	17	11/2021	3	0	2
1002	106.52	95.82	23	18.7	11/2021	3	0	2
1003	76.5	65.8	19.5	15.8	11/2021	4	1	2
1004	50.15	43.59	17.5	14	11/2021	4	0	2
1005	54.65	49.07	17	14	11/2021	4	0	2
1006	63.15	53.18	19	15.2	11/2021	4	0	2
1007	30.42	27.22	16.5	13	11/2021	4	1	2
1008	49.22	43.76	17	15	11/2021	4	1	2
1009	41.34	35.65	16.3	13	11/2021	4	0	2
1010	34.77	29.88	15.5	12.4	11/2021	4	0	2
1011	46.64	41.04	17.5	14.2	11/2021	4	0	2
1012	42.29	32.76	17	13.5	11/2021	4	0	2
1013	33.09	28.23	15.5	12.5	11/2021	4	1	2
1014	39.61	24.88	16	13.3	11/2021	4	0	2
1015	27.08	35.61	15	12.3	11/2021	4	1	2
1016	24.39	20.39	14.5	11.7	11/2021	4	0	2
1017	38.49	33.64	15	12.4	11/2021	4	1	2
1018	31.41	27.74	15.4	12	11/2021	4	1	2
1019	29.07	25.37	15	11.7	11/2021	4	1	2
1020	22.86	19.14	13.8	11	11/2021	4	0	2
1021	22.76	19.47	13.5	10.7	11/2021	4	1	2
1022	22.19	19.25	13.2	10.5	11/2021	4	1	2
1023	23.67	20.05	13	10.5	11/2021	4	1	2
1024	15.86	14.25	12.5	10.2	11/2021	4	0	2
1025	18.6	15.85	12	10	11/2021	4	1	2
1026	46.89	41.78	14.94	11.74	12/2021	1	0	2
1027	54.62	47.78	15.13	12.29	12/2021	1	0	2
1028	51.75	46.04	16.69	13.42	12/2021	1	1	2
1029	56.44	50.76	15.73	12.77	12/2021	1	1	2
1030	43.42	40.56	14.12	11.58	12/2021	1	0	2
1031	58.75	38.43	16.26	13.66	12/2021	1	1	2
1032	55.59	51.48	15.52	12.36	12/2021	1	1	2
1033	45.39	29.68	16.2	13.02	12/2021	1	0	2
1034	27.17	24.7	13.68	10.91	12/2021	1	1	2
1035	25.7	24.21	11.25	8.9	12/2021	1	1	2
1036	32.14	27.85	12.78	10.25	12/2021	1	0	2
1037	20.46	16.81	10.08	8.06	12/2021	1	0	2
1038	50.21	45.2	13.5	10.38	12/2021	1	1	2
1039	61.22	42.38	13.5	10.66	12/2021	1	1	2
1040	98.26	90.48	17.1	13.54	12/2021	1	0	2
1041	41.17	38.47	13.05	10.23	12/2021	1	1	2
1042	55.08	44.04	14.4	11.82	12/2021	1	0	2
1043	83.35	66.22	16.28	13.09	12/2021	1	0	2
1044	72.75	58	15.4	12.36	12/2021	1	0	2
1045	74.59	65.22	15.4	12.53	12/2021	1	1	2
1046	12.64	10.52	8.8	7.04	12/2021	1	1	2
1047	16.06	13.82	9.24	7.46	12/2021	1	1	2
1048	5.03	4.03	6.25	5.04	12/2021	1	1	2
1049	44.28	38.14	12.14	9.47	12/2021	1	1	2
1050	48.91	43.89	13.02	10.42	12/2021	1	0	2
1051	64.9	57.48	19	15.36	12/2021	1	0	2
1052	40.56	35.74	16.38	13.16	12/2021	1	1	2
1053	41.83	37.05	16.75	13.36	12/2021	2	1	2
1054	63.71	27.44	18.13	14.6	12/2021	2	0	2
1055	69.04	61.84	18.75	14.42	12/2021	2	0	2
1056	45.95	41.28	15.63	12.21	12/2021	2	0	2
1057	36.93	32.92	12.74	9.86	12/2021	2	0	2
1058	45.68	37.74	13.72	10.79	12/2021	2	0	2
1059	21.71	19.69	8.45	6.87	12/2021	2	1	2
1060	20.56	18.53	8.06	6.45	12/2021	2	1	2
1061	21.14	19.21	8.19	6.79	12/2021	2	1	2
1062	28.15	25.28	8.84	7.16	12/2021	2	1	2
1063	18.39	14.48	9.97	8.12	12/2021	2	1	2
1064	15.15	12.57	9.52	7.69	12/2021	2	0	2
1065	36.26	32.46	11.78	9.88	12/2021	2	1	2
1066	37.16	33.48	12.24	10.01	12/2021	2	1	2
1067	28.67	25.84	11.24	8.99	12/2021	2	1	2
1068	29.48	26.79	11.42	9.47	12/2021	2	1	2
1069	39.26	35.25	12.33	9.98	12/2021	2	1	2
1070	28.87	23.75	11.15	9.14	12/2021	2	0	2
1071	36.28	32.59	12.05	9.35	12/2021	2	0	2
1072	31.09	28.01	12.05	9.29	12/2021	2	1	2
1073	42.3	36.33	12.5	9.72	12/2021	2	0	2
1074	57.84	51.75	18.04	14.14	12/2021	2	1	2
1075	63.51	57.12	18.04	14.14	12/2021	2	0	2
1076	46.97	41.89	16.8	13.34	12/2021	3	0	2
1077	43.59	39.83	16.18	12.75	12/2021	3	1	2
1078	39.58	34.89	15.98	12.84	12/2021	3	1	2
1079	40.82	36.16	16.35	13.04	12/2021	3	1	2
1080	60.45	54.31	18.91	15.51	12/2021	3	0	2
1081	41.12	37.79	14.15	11.24	12/2021	3	0	2
1082	30.93	16.26	11.33	8.98	12/2021	3	1	2
1083	32.24	17.54	11	8.59	12/2021	3	1	2
1084	21.15	7.79	8.47	6.72	12/2021	3	0	2
1085	25.59	11.56	10.12	8.17	12/2021	3	1	2
1086	39.37	36.49	14.23	11.16	12/2021	3	1	2
1087	36.34	32.9	13.39	10.6	12/2021	3	1	2
1088	27.91	24.91	11.35	8.93	12/2021	3	0	2
1089	37.97	33.24	13.02	10.36	12/2021	3	0	2
1090	25.09	22.81	10.97	8.63	12/2021	3	1	2
1091	22.9	19.73	10.79	8.46	12/2021	3	1	2
1092	22.2	19.11	10.23	7.87	12/2021	3	1	2
1093	34.32	30.84	13.63	10.78	12/2021	3	0	2
1094	30.59	25.05	13.41	10.78	12/2021	3	0	2
1095	59.63	52.77	16.9	13.43	12/2021	3	0	2
1096	27.7	22.06	11.99	9.42	12/2021	3	0	2
1097	27.08	22.85	11.99	9.42	12/2021	4	0	2
1098	53.75	46.3	14.74	11.49	12/2021	4	1	2
1099	59.37	53.27	15.81	12.65	12/2021	4	0	2
1100	25.47	20.43	11.99	9.29	12/2021	4	0	2
1101	24.21	19.59	11.88	9.59	12/2021	4	1	2
1102	20.32	17.01	11.23	8.9	12/2021	4	1	2
1103	24.12	19.07	11.88	9.52	12/2021	4	0	2
1104	5.14	4.47	6.76	5.3	12/2021	4	1	2
1105	4.54	3.98	6.32	4.82	12/2021	4	1	2
1106	27.5	25.72	12.21	9.77	12/2021	4	1	2
1107	27.15	24.97	12.21	9.77	12/2021	4	1	2
1108	35.95	32.33	13.63	10.99	12/2021	4	0	2
1109	17.72	13.84	10.68	8.37	12/2021	4	0	2
1110	50.81	44.52	18.3	14.52	12/2021	4	1	2
1111	44.76	39.57	16.47	12.71	12/2021	4	0	2
1112	56.33	44.51	17.69	13.94	12/2021	4	0	2
1113	64.54	57.25	18.91	15.03	12/2021	4	1	2
1114	31.04	27.94	14.64	11.79	12/2021	4	1	2
1115	44.15	39.24	16.35	13.04	12/2021	4	1	2
1116	55.96	35.38	17.69	14.25	12/2021	4	1	2
1117	53.9	48.73	17.45	14.34	12/2021	4	1	2
1118	40.91	37.79	13.06	10.44	12/2021	4	1	2
1119	30.52	25.21	12.29	10.08	1/2022	1	1	2
1120	39.17	37.63	13.44	10.75	1/2022	1	0	2
1121	22.18	20.25	11.04	8.76	1/2022	1	1	2
1122	27.1	24.09	11.33	9.22	1/2022	1	0	2
1123	15.84	14.39	9.41	7.38	1/2022	1	0	2
1124	13.29	11.64	9.88	7.78	1/2022	1	0	2
1125	16.87	14.84	11.1	8.81	1/2022	1	0	2
1126	14.34	12.4	10.66	8.52	1/2022	1	1	2
1127	15.91	13.52	10.43	8.31	1/2022	1	0	2
1128	13.46	11.77	10.1	8.13	1/2022	1	0	2
1129	9.71	8.25	9.1	7.18	1/2022	1	1	2
1130	96.17	88.93	20.2	16.41	1/2022	1	1	2
1131	67.06	60.01	17.32	14.6	1/2022	1	1	2
1132	49.4	38.23	15.65	12.54	1/2022	1	0	2
1133	36.05	32.77	14.43	11.3	1/2022	1	1	2
1134	29.8	26.52	14.1	11.33	1/2022	1	1	2
1135	44.26	40.24	12.7	9.81	1/2022	1	1	2
1136	34.66	31.39	11.48	9.02	1/2022	2	1	2
1137	23.74	16.43	10.34	8.2	1/2022	2	0	2
1138	45.82	37.74	13.93	11.19	1/2022	2	0	2
1139	24.92	21.19	10.34	8.2	1/2022	2	1	2
1140	29.38	25.33	11.32	9.03	1/2022	2	1	2
1141	34.68	27.41	10.88	8.6	1/2022	2	0	2
1142	43.84	27.71	13.88	11.19	1/2022	2	1	2
1143	42.08	38.05	13.65	11.2	1/2022	2	1	2
1144	46.11	38.81	13.76	11.16	1/2022	2	1	2
1145	37.3	33.19	14.58	11.78	1/2022	2	0	2
1146	40.85	36.17	13.96	10.93	1/2022	2	0	2
1147	50.71	46.31	14.76	11.58	1/2022	2	0	2
1148	30.24	27.22	13.69	10.58	1/2022	2	0	2
1149	20.56	17.24	11.11	8.69	1/2022	2	1	2
1150	46.18	40.03	15.65	12.3	1/2022	2	0	2
1151	59.01	51.8	17.87	14.97	1/2022	2	1	2
1152	41.12	36.86	14.67	11.71	1/2022	2	1	2
1153	39.76	34.58	14.67	11.92	1/2022	2	1	2
1154	20.9	18	13.34	10.84	1/2022	2	0	2
1155	18.56	16.23	13.46	10.67	1/2022	2	0	2
1156	18.95	16.78	12.54	9.49	1/2022	2	1	2
1157	16.15	13.94	13	10.56	1/2022	2	1	2
1158	39.85	36.58	17.27	14.03	1/2022	2	1	2
1159	27.78	20.49	15.49	12.28	1/2022	2	1	2
1160	47.14	40.84	16.29	13.27	1/2022	2	1	2
1161	37.01	33.52	14.69	11.73	1/2022	2	1	2
1162	38.42	34.85	14.95	12.16	1/2022	3	1	2
1163	21.76	19.87	12.28	9.66	1/2022	3	1	2
1164	44.46	38.94	16.47	14.05	1/2022	3	1	2
1165	51.1	47.75	16.2	12.72	1/2022	3	1	2
1166	68.1	54.45	17.8	14.57	1/2022	3	0	2
1167	51.82	46.18	18.02	15.4	1/2022	3	0	2
1168	46.52	40.54	16.73	13.96	1/2022	3	1	2
1169	91.12	84.55	26.04	23.46	1/2022	3	1	2
1170	43.69	39.37	17.03	13.76	1/2022	3	0	2
1171	72.94	67.14	19.21	15.25	1/2022	3	1	2
1172	101.49	80.18	20.1	16.28	1/2022	3	0	2
1173	41.97	36.52	15.84	13.05	1/2022	3	1	2
1174	51.65	44.47	18.02	14.15	1/2022	3	1	2
1175	33.22	29.1	14.65	11.93	1/2022	3	1	2
1176	25.65	22.21	14.26	11.7	1/2022	3	1	2
1177	22.12	19.31	12.38	9.57	1/2022	3	1	2
1178	24.96	21.92	13.07	10.59	1/2022	4	1	2
1179	13.85	11.76	10.59	8.23	1/2022	4	1	2
1180	20.79	18.13	12.38	10.29	1/2022	4	1	2
1181	91.11	72.77	26.08	22.73	1/2022	4	0	2
1182	38	34.4	19.15	15.56	1/2022	4	1	2
1183	67.56	61.53	23.31	18.56	1/2022	4	1	2
1184	51.22	44.71	21.42	17.86	1/2022	4	1	2
1185	157.12	140.5	30.11	28.38	1/2022	4	0	2
1186	108.08	95.49	23.31	19.12	1/2022	4	1	2
1187	80.53	70.09	20.34	15.97	1/2022	4	1	2
1188	105.16	94.06	24.41	21.58	1/2022	4	0	2
1189	73.27	63.89	21.7	17.41	1/2022	4	0	2
1190	91.66	84.53	22.95	20.85	1/2022	4	0	2
1191	95.97	85.89	24.07	19.49	1/2022	4	1	2
1192	57.52	51.66	19.1	14.8	1/2022	4	0	2
1193	83.65	74.92	22.71	18.69	1/2022	4	0	2
1194	52.16	46.86	17.74	13.89	1/2022	4	0	2
1195	53.39	47.59	18.42	14.26	1/2022	4	1	2
1196	65.84	54.4	19.78	15.52	1/2022	4	0	2
1197	67.77	61.17	20	16.52	1/2022	4	1	2
1198	66.08	59.62	20.11	16.24	1/2022	4	1	2
1199	66.57	59	21.13	18.55	2/2022	1	1	2
1200	65.4	58.42	20.11	16.71	2/2022	1	1	2
1201	45.3	40.13	18.14	14.48	2/2022	1	1	2
1202	51.71	29.76	19.66	15.86	2/2022	1	0	2
1203	79.95	71.6	21.71	17.86	2/2022	1	0	2
1204	49.85	44.79	16.96	13.28	2/2022	1	0	2
1205	55.7	49.87	18.68	15.18	2/2022	1	1	2
1206	64.72	51.54	18.68	14.83	2/2022	1	0	2
1207	56.93	47.33	18.25	14.56	2/2022	1	0	2
1208	56.93	47.33	18.25	14.56	2/2022	1	0	2
1209	48.7	43.39	17.28	13.38	2/2022	1	0	2
1210	54.06	42.16	16.96	13.44	2/2022	1	0	2
1211	51.58	47.08	18.68	14.83	2/2022	1	0	2
1212	71.15	64.56	20.3	16.03	2/2022	1	1	2
1213	34.2	29.67	15.55	12.33	2/2022	1	0	2
1214	22.68	19.78	13.5	11.22	2/2022	1	1	2
1215	13.3	11.53	10.45	8.34	2/2022	1	1	2
1216	24.05	20.63	12.83	10.63	2/2022	2	1	2
1217	114.72	103.03	22.23	19.96	2/2022	2	0	2
1218	62.87	34.82	19.1	15.55	2/2022	2	0	2
1219	47.32	42.85	15.68	12.29	2/2022	2	1	2
1220	48.93	42.73	16.63	13.27	2/2022	2	0	2
1221	46.81	43.52	16.06	12.74	2/2022	2	0	2
1222	55.42	49.34	16.63	13.42	2/2022	2	0	2
1223	46.81	43.52	16.06	12.74	2/2022	2	0	2
1224	56.93	45.34	16.44	13.04	2/2022	2	0	2
1225	48.54	43.73	18.81	16.18	2/2022	2	1	2
1226	64.01	54.97	18.91	15.89	2/2022	2	0	2
1227	47.9	44.12	16.91	13.46	2/2022	2	0	2
1228	45.47	39.95	17.04	13.83	2/2022	2	0	2
1229	99.53	88.39	20.4	16.51	2/2022	2	0	2
1230	53.35	47.86	17.4	15.57	2/2022	2	1	2
1231	55.86	49.43	16.8	13.52	2/2022	2	0	2
1232	23.7	20.53	13.2	10.76	2/2022	2	0	2
1233	44	38.3	16.8	13.44	2/2022	2	1	2
1234	19.91	16.87	11.76	9.37	2/2022	2	1	2
1235	21.83	18	12.6	9.95	2/2022	2	1	2
1236	13.95	11.77	8.82	7.03	2/2022	2	1	2
1237	16.22	13.74	9.45	7.63	2/2022	2	1	2
1238	32.27	30.04	12.33	9.65	2/2022	2	1	2
1239	93.92	85.76	18.27	15.78	2/2022	3	0	2
1240	40.35	36.7	12.6	9.69	2/2022	3	0	2
1241	66.08	61.34	14.85	11.4	2/2022	3	0	2
1242	93.7	83.72	16.2	12.96	2/2022	3	0	2
1243	61.42	55.9	14.4	11.52	2/2022	3	0	2
1244	52.97	48.76	13.95	11.09	2/2022	3	1	2
1245	96.53	87.49	18	14.4	2/2022	3	0	2
1246	16.61	14.44	9.24	7.46	2/2022	3	1	2
1247	18.21	15.77	10.12	8.31	2/2022	3	1	2
1248	15.72	13.73	8.8	6.82	2/2022	3	1	2
1249	17.66	15.49	9.24	7.46	2/2022	3	1	2
1250	9.78	8.3	7.48	5.78	2/2022	3	1	2
1251	69.17	61.93	15.05	12.14	2/2022	3	1	2
1252	79.26	67.28	14.96	11.83	2/2022	3	0	2
1253	60.38	53.35	13.02	10.71	2/2022	3	1	2
1254	50.17	43.67	12.67	9.97	2/2022	3	1	2
1255	84.73	75.82	21.25	17.2	2/2022	3	1	2
1256	50.82	45.64	16.88	13.09	2/2022	3	0	2
1257	43.54	39.23	16.88	13.02	2/2022	3	1	2
1258	59.25	50.89	17.5	13.61	2/2022	4	0	2
1259	47.82	44.03	16.88	13.4	2/2022	4	0	2
1260	46.83	42.27	13.82	11.39	2/2022	4	1	2
1261	45.71	41.24	13.92	11.23	2/2022	4	1	2
1262	46	40.77	14.6	12.8	2/2022	4	1	2
1263	45.26	40.42	13.92	11.56	2/2022	4	1	2
1264	13.19	10.38	7.15	5.83	2/2022	4	1	2
1265	10.87	9.79	6.83	5.51	2/2022	4	0	2
1266	26	23.28	8.45	7.09	2/2022	4	1	2
1267	26.65	24.01	8.78	7.18	2/2022	4	1	2
1268	47.12	44.34	11.38	8.85	2/2022	4	0	2
1269	12.67	11.57	7.15	5.62	2/2022	4	1	2
1270	8.3	6.67	6.24	5.71	2/2022	4	1	2
1271	35.24	30.83	9.71	8.14	2/2022	4	0	2
1272	28.52	27.12	9.51	7.8	2/2022	4	1	2
1273	42	37.75	12.78	10.54	2/2022	4	1	2
1274	42.43	37.99	12.69	10.45	2/2022	4	0	2
1275	38.23	34.35	12.87	10.69	2/2022	4	0	2
1276	21.21	19.21	10.7	8.7	2/2022	4	1	2
1277	37.57	34.21	12.96	10.3	2/2022	4	1	2
1278	28.61	24.97	11.96	10	2/2022	4	1	2
1279	61.45	56.18	14.96	11.75	2/2022	4	1	2
1280	21.95	1.65	12.24	9.72	2/2022	4	1	2
1281	23.84	20.75	10.51	8.71	2/2022	4	1	2
1282	11.18	10.36	8.4	7.68	2/2022	4	1	2
1283	41.66	37.09	12.5	10.11	2/2022	4	0	2
1284	41.66	37.48	12.76	10.31	3/2022	1	0	2
1285	33.69	30.04	12.05	9.57	3/2022	1	0	2
1286	31.26	28.56	11.6	9.14	3/2022	1	0	2
1287	37.92	34.26	12.05	9.57	3/2022	1	0	2
1288	65.29	28.12	18.57	14.96	3/2022	1	0	2
1289	70.75	63.37	19.22	14.78	3/2022	1	0	2
1290	47.09	42.3	16.01	12.51	3/2022	1	0	2
1291	48.27	43.03	16.65	12.89	3/2022	1	0	2
1292	45.74	41.09	15.56	12.15	3/2022	1	0	2
1293	51.19	45.83	17.17	13.94	3/2022	1	0	2
1294	47.4	43.27	17.17	13.62	3/2022	1	0	2
1295	37.7	32.46	15.37	12.42	3/2022	1	1	2
1296	56.53	50.81	17.2	14.18	3/2022	1	0	2
1297	57.11	51.14	17.08	14.07	3/2022	1	0	2
1298	35.44	30.95	12.04	9.63	3/2022	1	0	2
1299	33.85	31.47	11.61	9.22	3/2022	1	0	2
1300	40.14	35.74	12.04	9.74	3/2022	1	0	2
1301	19.85	17.6	9.89	7.84	3/2022	1	0	2
1302	11.04	9.53	8	6.36	3/2022	1	0	2
1303	14.29	12.1	8.43	6.71	3/2022	1	1	2
1304	22.77	19.68	9.98	7.98	3/2022	1	0	2
1305	6.76	5.42	6.45	5.09	3/2022	1	1	2
1306	24.25	20.79	12.43	9.69	3/2022	1	1	2
1307	50.09	33.15	14.52	11.98	3/2022	1	1	2
1308	39.6	24.1	12.43	9.69	3/2022	1	1	2
1309	35.98	27.03	12.32	10	3/2022	1	0	2
1310	43.27	20.01	13.2	10.7	3/2022	2	1	2
1311	17.76	15.23	10.78	8.8	3/2022	2	1	2
1312	21.97	19.05	11	8.59	3/2022	2	1	2
1313	21.18	17.96	11.55	9.7	3/2022	2	1	2
1314	23.92	20.12	11.55	9.7	3/2022	2	1	2
1315	39.55	34.94	14.41	11.51	3/2022	2	0	2
1316	26.33	22.4	12.32	9.72	3/2022	2	1	2
1317	25.79	21.93	10.7	8.48	3/2022	2	1	2
1318	30.4	26.21	11.72	9.34	3/2022	2	1	2
1319	43.59	38.35	13.58	10.77	3/2022	2	1	2
1320	21.26	17.85	10.6	8.45	3/2022	2	1	2
1321	35.87	31.59	12.56	10.03	3/2022	2	0	2
1322	23.94	20.82	10.7	8.48	3/2022	2	0	2
1323	26.33	23.33	11.63	9.38	3/2022	2	0	2
1324	45.82	40.29	15.26	12.21	3/2022	2	0	2
1325	27.76	22.2	14.93	12.03	3/2022	2	0	2
1326	34.41	27.26	13.08	10.19	3/2022	2	0	2
1327	73.29	64.76	15.81	13	3/2022	2	1	2
1328	60.9	53.01	15.38	12.1	3/2022	2	1	2
1329	68.56	61.32	15.92	12.16	3/2022	2	0	2
1330	69.45	60.72	15.92	12.16	3/2022	2	0	2
1331	54.35	49.4	15.6	12.05	3/2022	2	1	2
1332	42.56	38.54	14.1	11.08	3/2022	2	1	2
1333	27.56	22.93	12.54	9.94	3/2022	2	1	2
1334	26.55	21.13	12.54	10.3	3/2022	2	1	2
1335	25.78	22.35	11.99	9.42	3/2022	2	1	2
1336	26.08	21.36	11.99	9.7	3/2022	2	0	2
1337	10.79	9.4	8.94	7.26	3/2022	2	0	2
1338	32.05	28.07	14.15	11.02	3/2022	2	1	2
1339	27.26	23.71	12.81	9.82	3/2022	2	0	2
1340	45.27	40.99	15.86	12.57	3/2022	2	1	2
1341	35.97	20.94	14.64	11.71	3/2022	2	1	2
1342	81.76	69.85	19.52	16.02	3/2022	3	0	2
1343	43.66	42.03	15.98	12.92	3/2022	3	1	2
1344	66.65	52	17.81	13.98	3/2022	3	0	2
1345	59.45	52.96	18.42	14.49	3/2022	3	0	2
1346	44.19	42.93	14.76	11.75	3/2022	3	0	2
1347	27.01	25.31	11.81	9.37	3/2022	3	1	2
1348	27.36	24.98	11.52	9.22	3/2022	3	0	2
1349	47.49	44.11	13.63	11.06	3/2022	3	1	2
1350	36.76	33.22	12.67	10.08	3/2022	3	0	2
1351	32.67	29.91	12.77	10.29	3/2022	3	0	2
1352	46.39	40.15	13.92	11.21	3/2022	3	0	2
1353	40.87	36.99	13.92	11.34	3/2022	3	1	2
1354	40.52	35.13	13.73	10.79	3/2022	3	0	2
1355	48.83	42.87	14.78	11.68	3/2022	3	1	2
1356	36.05	32.31	12.86	10.26	3/2022	3	1	2
1357	17.24	14.95	10.66	8.52	3/2022	3	1	2
1358	17.15	14.96	10.88	8.6	3/2022	3	1	2
1359	18.83	16.45	11.88	9.56	3/2022	3	0	2
1360	14.93	13.22	9.88	7.51	3/2022	3	1	2
1361	12.7	10.95	10.21	8.31	3/2022	3	1	2
1362	10.62	9.11	9.44	7.36	3/2022	3	1	2
1363	27.95	24.66	13.32	10.31	3/2022	3	1	2
1364	32.38	29.06	14.32	11.33	3/2022	3	1	2
1365	29.32	25.85	14.21	11.58	3/2022	3	0	2
1366	24.38	21.13	13.1	10.51	3/2022	3	1	2
1367	55.85	48.11	15.32	11.94	3/2022	4	0	2
1368	78.36	66.51	14.79	11.69	3/2022	4	0	2
1369	59.69	52.74	12.88	10.59	3/2022	4	0	2
1370	49.6	43.17	12.53	9.86	3/2022	4	1	2
1371	22.84	18.19	9.89	7.77	3/2022	4	0	2
1372	26.93	23.44	11.23	8.78	3/2022	4	1	2
1373	31.86	27.97	12.13	9.69	3/2022	4	1	2
1374	22.33	18.84	9.89	7.77	3/2022	4	0	2
1375	19.72	17.27	8.7	6.8	3/2022	4	1	2
1376	16.64	14.47	7.83	5.97	3/2022	4	0	2
1377	27.82	25.2	9.74	7.74	3/2022	4	1	2
1378	22.01	12.82	8.96	7.15	3/2022	4	1	2
1379	20.17	17.79	10.55	8.35	3/2022	4	1	2
1380	59.27	53.9	18.87	14.9	3/2022	4	0	2
1381	58.08	53.65	18.54	14.8	3/2022	4	0	2
1382	55.63	53.45	19.09	15.25	3/2022	4	1	2
1383	28.21	24.73	15.32	12.28	3/2022	4	1	2
